# Supplementary material for: Double burden of maternal and child malnutrition and socioeconomic status in urban Sri Lanka
Source: PubMed Central journal article supplement (PMC6805006; doi:10.1371/journal.pone.0224222), 2019-10-22
Supplement: pone.0224222.s002.pdf [file pone.0224222.s002.pdf]

|             |     |       |      |             |
|-------------|-----|-------|------|-------------|
| Serial no:  |     |       |      |             |
| School Name |     |       |      |             |
| Type        | 1AB | 1C    | 2    | 3           |
| Grade       |     | Class | Date | / Sep /2017 |

**Data collection sheet**  
**A study on child malnutrition among primary school children in Gampaha district**

| <b>Anthropometric Measurements of the child</b> |                            |
|-------------------------------------------------|----------------------------|
| 1. Serial number : _____                        |                            |
| 2. Height (cm) : _____ cm                       |                            |
| 3. Weight (kg) : _____ kg                       |                            |
| 4. Waist circumference (cm) : _____ cm          |                            |
| 5. MUAC (mm) : _____ mm                         |                            |
| 6. Skinfold thickness (mm) :                    |                            |
| 6-1. Triceps : _____ mm                         | 6-2. Biceps : _____ mm     |
| 6-3. Subscapular : _____ mm                     | 6-4. Suprailiac : _____ mm |

We are trying to find out about risk factors related to malnutrition among primary school children. Please answer following questions to the best of your knowledge.

**Remember:**

1. This is not a test. So there are no right and wrong answers.
2. Please answer all the questions as honestly and accurately as you can – this is very important.
3. Please use a pencil to fill in completely the column that goes with your answer choice.
4. Please use following instructions when answering,

place a check mark (✓) in the square                      Eg.:  Sinhalese  
put a circle (○) in the appropriate number              Eg.: 1 (2) 3 4  
write down your answer if there is no specific instruction.

5. Please refer to “Child Health Development Record” when filling the section of “Child Health Status” in this questionnaire,

## Questionnaire

|                                                                                                                                                                                                                                                  |                                                                                                                                                                                                     |
|--------------------------------------------------------------------------------------------------------------------------------------------------------------------------------------------------------------------------------------------------|-----------------------------------------------------------------------------------------------------------------------------------------------------------------------------------------------------|
| <b>Child basic information</b>                                                                                                                                                                                                                   |                                                                                                                                                                                                     |
| 1. Name (surname / first name) :                                                                                                                                                                                                                 |                                                                                                                                                                                                     |
| 2. Sex : <sup>1</sup> <input type="checkbox"/> Girl <sup>2</sup> <input type="checkbox"/> Boy                                                                                                                                                    | 3. Birthday (dd/mm/yy): ____ / ____ / ____<br>Age (dd/mm/yy): ____ / ____ / ____ (on date)                                                                                                          |
| 4. Ethnic : <sup>1</sup> <input type="checkbox"/> Sinhala <sup>2</sup> <input type="checkbox"/> Tamil <sup>3</sup> <input type="checkbox"/> Muslim <sup>4</sup> <input type="checkbox"/> Other                                                   | 5. Language : <sup>1</sup> <input type="checkbox"/> Sinhalese <sup>2</sup> <input type="checkbox"/> Tamil <sup>3</sup> <input type="checkbox"/> English <sup>4</sup> <input type="checkbox"/> Other |
| 6. Religion : <sup>1</sup> <input type="checkbox"/> Buddhist <sup>2</sup> <input type="checkbox"/> Hindu <sup>3</sup> <input type="checkbox"/> Islam <sup>4</sup> <input type="checkbox"/> Christian <sup>5</sup> <input type="checkbox"/> Other |                                                                                                                                                                                                     |

|                                                                                                                                                                                                                                                                                                                                                                                                                                                                                                                                                                                                                                                                                                                                                        |  |
|--------------------------------------------------------------------------------------------------------------------------------------------------------------------------------------------------------------------------------------------------------------------------------------------------------------------------------------------------------------------------------------------------------------------------------------------------------------------------------------------------------------------------------------------------------------------------------------------------------------------------------------------------------------------------------------------------------------------------------------------------------|--|
| <b>Child's Family structure</b>                                                                                                                                                                                                                                                                                                                                                                                                                                                                                                                                                                                                                                                                                                                        |  |
| 7. Who is the responder? <sup>1</sup> <input type="checkbox"/> Mother <sup>2</sup> <input type="checkbox"/> Father <sup>3</sup> <input type="checkbox"/> Guardian <sup>4</sup> <input type="checkbox"/> Other: specify( _____ )                                                                                                                                                                                                                                                                                                                                                                                                                                                                                                                        |  |
| 8. Number of family members living together with the child*? <sup>1</sup> TOTAL _____ ( <sup>2</sup> Adult - _____ <sup>3</sup> Child- _____ *except for the child )<br>Details : <sup>1</sup> <input type="checkbox"/> Grandfather ( ____people) <sup>2</sup> <input type="checkbox"/> Grandmother ( ____people) <sup>3</sup> <input type="checkbox"/> Father <sup>4</sup> <input type="checkbox"/> Mother <sup>5</sup> <input type="checkbox"/> Older brother ( ____people)<br><sup>6</sup> <input type="checkbox"/> Older sister ( ____people) <sup>7</sup> <input type="checkbox"/> Younger brother ( ____people) <sup>8</sup> <input type="checkbox"/> Younger sister ( ____people) <sup>9</sup> <input type="checkbox"/> Other: specify( _____ ) |  |
| 9. What is the average monthly income of your family?<br><sup>1</sup> less than Rs.7,500 <sup>2</sup> Rs. 7,500 - < Rs,15,000 <sup>3</sup> Rs. 15,000 - < Rs.50,000 <sup>4</sup> more than Rs. 50,000 <sup>5</sup> Unknown                                                                                                                                                                                                                                                                                                                                                                                                                                                                                                                             |  |

10. Please answer child's family structure (This family means parents and siblings of the child).

| Family Structure                                                                                                                                                                                               | Example                                       | a                                                  | b                                                  | c                                                  | d                                                  | e                                                  | f                                                  |
|----------------------------------------------------------------------------------------------------------------------------------------------------------------------------------------------------------------|-----------------------------------------------|----------------------------------------------------|----------------------------------------------------|----------------------------------------------------|----------------------------------------------------|----------------------------------------------------|----------------------------------------------------|
| <b>A) Relationship</b><br>1.Mother 2.Father<br>3.Older brother 4.Older sister<br>5.Younger brother<br>6.Younger sister 7.Other                                                                                 | 1<br>_____                                    | _____                                              | _____                                              | _____                                              | _____                                              | _____                                              | _____                                              |
| <b>B) Age (years old)</b>                                                                                                                                                                                      | 40                                            |                                                    |                                                    |                                                    |                                                    |                                                    |                                                    |
| <b>C) Height and weight</b>                                                                                                                                                                                    | H <sup>1</sup> 170 cm<br>W <sup>2</sup> 70 kg | H <sup>1</sup> _____ cm<br>W <sup>2</sup> _____ kg | H <sup>1</sup> _____ cm<br>W <sup>2</sup> _____ kg | H <sup>1</sup> _____ cm<br>W <sup>2</sup> _____ kg | H <sup>1</sup> _____ cm<br>W <sup>2</sup> _____ kg | H <sup>1</sup> _____ cm<br>W <sup>2</sup> _____ kg | H <sup>1</sup> _____ cm<br>W <sup>2</sup> _____ kg |
| <b>D) Educational status</b><br>*Choose one<br>1.No education<br>2.Incomplete primary<br>3.Complete primary<br>4.Incomplete secondary<br>5.Complete secondary<br>6.Higher 7.Other                              | 1 2 ③<br>4 5 6<br>7                           | 1 2 3<br>4 5 6<br>7                                | 1 2 3<br>4 5 6<br>7                                | 1 2 3<br>4 5 6<br>7                                | 1 2 3<br>4 5 6<br>7                                | 1 2 3<br>4 5 6<br>7                                | 1 2 3<br>4 5 6<br>7                                |
| <b>E) Work status</b><br>*Choose one of the main work<br>1.Infant 2.Schooling<br>3.Job-hunting 4.Unemployment<br>5.Agriculture 6.Government<br>7.Private sector<br>8.Self-employment<br>9.Housekeeper 10.Other | 1 2 3<br>4 5 ⑥<br>7 8 9<br>10                 | 1 2 3<br>4 5 6<br>7 8 9<br>10                      | 1 2 3<br>4 5 6<br>7 8 9<br>10                      | 1 2 3<br>4 5 6<br>7 8 9<br>10                      | 1 2 3<br>4 5 6<br>7 8 9<br>10                      | 1 2 3<br>4 5 6<br>7 8 9<br>10                      | 1 2 3<br>4 5 6<br>7 8 9<br>10                      |
| <b>F) Health condition</b><br>*Mark all that apply<br>1.Diabetes 2.CKD<br>3.Dengue (in past 3 months)<br>4.Other (Specify)                                                                                     | 1 2 ③<br>4<br>_____                           | 1 2 3<br>4<br>_____                                | 1 2 3<br>4<br>_____                                | 1 2 3<br>4<br>_____                                | 1 2 3<br>4<br>_____                                | 1 2 3<br>4<br>_____                                | 1 2 3<br>4<br>_____                                |

| Child Health Status                                                                                                                                                                                                                                                                                                                                                                        |                                           |                                                                                                                                                                                        |                                                                                                                                                                                                                                     |                                                                                                                                                                                        |                                             |                                            |                                                                                           |                                            |                                                                                         |                 |
|--------------------------------------------------------------------------------------------------------------------------------------------------------------------------------------------------------------------------------------------------------------------------------------------------------------------------------------------------------------------------------------------|-------------------------------------------|----------------------------------------------------------------------------------------------------------------------------------------------------------------------------------------|-------------------------------------------------------------------------------------------------------------------------------------------------------------------------------------------------------------------------------------|----------------------------------------------------------------------------------------------------------------------------------------------------------------------------------------|---------------------------------------------|--------------------------------------------|-------------------------------------------------------------------------------------------|--------------------------------------------|-----------------------------------------------------------------------------------------|-----------------|
| 11. Do you have "Child Health Development Record"? <sup>1</sup> <input type="checkbox"/> Yes <sup>2</sup> <input type="checkbox"/> No                                                                                                                                                                                                                                                      |                                           |                                                                                                                                                                                        |                                                                                                                                                                                                                                     |                                                                                                                                                                                        |                                             |                                            |                                                                                           |                                            |                                                                                         |                 |
| 12. Birth weight : <sup>1</sup> <input type="checkbox"/> less than 2,500g <sup>2</sup> <input type="checkbox"/> 2,500g - 4,000g <sup>3</sup> <input type="checkbox"/> > 4,000g <sup>4</sup> <input type="checkbox"/> Unknown                                                                                                                                                               |                                           |                                                                                                                                                                                        |                                                                                                                                                                                                                                     |                                                                                                                                                                                        |                                             |                                            |                                                                                           |                                            |                                                                                         |                 |
| 13. Immunization status (Mark all that apply)                                                                                                                                                                                                                                                                                                                                              |                                           |                                                                                                                                                                                        |                                                                                                                                                                                                                                     |                                                                                                                                                                                        |                                             |                                            |                                                                                           |                                            |                                                                                         |                 |
|                                                                                                                                                                                                                                                                                                                                                                                            | After birth                               | 0-4week                                                                                                                                                                                | 2 month                                                                                                                                                                                                                             | 4 month                                                                                                                                                                                | 6 month                                     | 9 month                                    | 12 month                                                                                  | 18month                                    | 3 years                                                                                 | 5 years         |
| Vaccine                                                                                                                                                                                                                                                                                                                                                                                    | <sup>1</sup> <input type="checkbox"/> BCG | <sup>1</sup> <input type="checkbox"/> OPV1<br><sup>2</sup> <input type="checkbox"/> DTwP1<br><sup>3</sup> <input type="checkbox"/> HepE1<br><sup>4</sup> <input type="checkbox"/> Hib1 | <sup>1</sup> <input type="checkbox"/> OPV2<br><sup>2</sup> <input type="checkbox"/> DTwP2<br><sup>3</sup> <input type="checkbox"/> HepE2<br><sup>4</sup> <input type="checkbox"/> Hib2<br><sup>5</sup> <input type="checkbox"/> IPV | <sup>1</sup> <input type="checkbox"/> OPV3<br><sup>2</sup> <input type="checkbox"/> DTwP3<br><sup>3</sup> <input type="checkbox"/> HepE3<br><sup>4</sup> <input type="checkbox"/> Hib3 | <sup>1</sup> <input type="checkbox"/> LAJEV | <sup>1</sup> <input type="checkbox"/> MMR1 | <sup>1</sup> <input type="checkbox"/> OPV4<br><sup>2</sup> <input type="checkbox"/> DTwP4 | <sup>1</sup> <input type="checkbox"/> MMR2 | <sup>1</sup> <input type="checkbox"/> OPV5<br><sup>2</sup> <input type="checkbox"/> DT1 |                 |
| 14. Disease episode so far; (Mark all that apply)                                                                                                                                                                                                                                                                                                                                          |                                           |                                                                                                                                                                                        |                                                                                                                                                                                                                                     |                                                                                                                                                                                        |                                             |                                            |                                                                                           |                                            |                                                                                         |                 |
| <sup>1</sup> <input type="checkbox"/> Pneumonia <sup>2</sup> <input type="checkbox"/> Asthma <sup>3</sup> <input type="checkbox"/> Malaria <sup>4</sup> <input type="checkbox"/> Influenza <sup>5</sup> <input type="checkbox"/> Anemia <sup>6</sup> <input type="checkbox"/> Worm infestation <sup>7</sup> <input type="checkbox"/> Diabetes <sup>8</sup> <input type="checkbox"/> Dengue |                                           |                                                                                                                                                                                        |                                                                                                                                                                                                                                     |                                                                                                                                                                                        |                                             |                                            |                                                                                           |                                            |                                                                                         |                 |
| <sup>9</sup> <input type="checkbox"/> Other: Specify ( _____ )                                                                                                                                                                                                                                                                                                                             |                                           |                                                                                                                                                                                        |                                                                                                                                                                                                                                     |                                                                                                                                                                                        |                                             |                                            |                                                                                           |                                            |                                                                                         |                 |
| 15. Any health issues during last month? (Mark all that apply)                                                                                                                                                                                                                                                                                                                             |                                           |                                                                                                                                                                                        |                                                                                                                                                                                                                                     |                                                                                                                                                                                        |                                             |                                            |                                                                                           |                                            |                                                                                         |                 |
| <sup>1</sup> <input type="checkbox"/> Diarrhoea <sup>2</sup> <input type="checkbox"/> Vomitting <sup>3</sup> <input type="checkbox"/> Anaemia <sup>4</sup> <input type="checkbox"/> Headache <sup>5</sup> <input type="checkbox"/> Fever <sup>6</sup> <input type="checkbox"/> Weight loss <sup>7</sup> <input type="checkbox"/> Any infectious disease                                    |                                           |                                                                                                                                                                                        |                                                                                                                                                                                                                                     |                                                                                                                                                                                        |                                             |                                            |                                                                                           |                                            |                                                                                         |                 |
| <sup>8</sup> <input type="checkbox"/> Traffic accident <sup>9</sup> <input type="checkbox"/> Other: specify ( _____ )                                                                                                                                                                                                                                                                      |                                           |                                                                                                                                                                                        |                                                                                                                                                                                                                                     |                                                                                                                                                                                        |                                             |                                            |                                                                                           |                                            |                                                                                         |                 |
| 16. What time normally does the child wake up and go to bed?: <sup>1</sup> Go to bed (PM ____ : ____) <sup>2</sup> Wake up (AM ____ : ____)                                                                                                                                                                                                                                                |                                           |                                                                                                                                                                                        |                                                                                                                                                                                                                                     |                                                                                                                                                                                        |                                             |                                            |                                                                                           |                                            |                                                                                         |                 |
| 17. How many minutes does it take from your house to the school? (Choose one for each)                                                                                                                                                                                                                                                                                                     |                                           |                                                                                                                                                                                        |                                                                                                                                                                                                                                     |                                                                                                                                                                                        |                                             |                                            |                                                                                           |                                            |                                                                                         |                 |
| Type: <sup>1</sup> <input type="checkbox"/> on foot <sup>2</sup> <input type="checkbox"/> by bicycle <sup>3</sup> <input type="checkbox"/> by car <sup>4</sup> <input type="checkbox"/> by school bus <sup>5</sup> <input type="checkbox"/> by train <sup>6</sup> <input type="checkbox"/> Others: specify( _____ )                                                                        |                                           |                                                                                                                                                                                        |                                                                                                                                                                                                                                     |                                                                                                                                                                                        |                                             |                                            |                                                                                           |                                            |                                                                                         |                 |
| Minutes: <sup>1</sup> <input type="checkbox"/> less than 10minutes <sup>2</sup> <input type="checkbox"/> 10~< 30minuites <sup>3</sup> <input type="checkbox"/> 30~< 60minuites <sup>4</sup> <input type="checkbox"/> more than 60minuites                                                                                                                                                  |                                           |                                                                                                                                                                                        |                                                                                                                                                                                                                                     |                                                                                                                                                                                        |                                             |                                            |                                                                                           |                                            |                                                                                         |                 |
| 18. Does the child do physical activities except for the school physical class? (club activities, sport clubs etc.)                                                                                                                                                                                                                                                                        |                                           |                                                                                                                                                                                        |                                                                                                                                                                                                                                     |                                                                                                                                                                                        |                                             |                                            |                                                                                           |                                            |                                                                                         |                 |
| <sup>1</sup> <input type="checkbox"/> No <sup>2</sup> <input type="checkbox"/> Yes → If yes, please specify the activity: _____                                                                                                                                                                                                                                                            |                                           |                                                                                                                                                                                        |                                                                                                                                                                                                                                     |                                                                                                                                                                                        |                                             |                                            |                                                                                           |                                            |                                                                                         |                 |
| 19. Physical activity of the child: Please answer of free time physical activity frequencies and hours spent per one opportunity in a typical week.                                                                                                                                                                                                                                        |                                           |                                                                                                                                                                                        |                                                                                                                                                                                                                                     |                                                                                                                                                                                        |                                             |                                            |                                                                                           |                                            |                                                                                         |                 |
| Physical Activity                                                                                                                                                                                                                                                                                                                                                                          | Frequency (per week)                      |                                                                                                                                                                                        |                                                                                                                                                                                                                                     |                                                                                                                                                                                        |                                             | Time spent for one opportunity             |                                                                                           |                                            |                                                                                         |                 |
|                                                                                                                                                                                                                                                                                                                                                                                            | Almost everyday                           | 5-6 times                                                                                                                                                                              | 3-4 times                                                                                                                                                                                                                           | 1-2 times                                                                                                                                                                              | Never                                       | less than 30 mins                          | 30-59 mins                                                                                | 1-2 hrs                                    | 2-3 hrs                                                                                 | More than 3 hrs |
| a) Vigorous-intensity activities (e.g. running and swimming)                                                                                                                                                                                                                                                                                                                               | 1                                         | 2                                                                                                                                                                                      | 3                                                                                                                                                                                                                                   | 4                                                                                                                                                                                      | 5                                           | a                                          | b                                                                                         | c                                          | d                                                                                       | e               |
| b) Moderate-intensity activities (e.g. brisk walking and dancing)                                                                                                                                                                                                                                                                                                                          | 1                                         | 2                                                                                                                                                                                      | 3                                                                                                                                                                                                                                   | 4                                                                                                                                                                                      | 5                                           | a                                          | b                                                                                         | c                                          | d                                                                                       | e               |
| c) Light-intensity activities (e.g. walking slowly)                                                                                                                                                                                                                                                                                                                                        | 1                                         | 2                                                                                                                                                                                      | 3                                                                                                                                                                                                                                   | 4                                                                                                                                                                                      | 5                                           | a                                          | b                                                                                         | c                                          | d                                                                                       | e               |
| 20. Sedentary behaviour: How much time does the child usually spend sitting or reclining on a typical day?: _____ hours per day                                                                                                                                                                                                                                                            |                                           |                                                                                                                                                                                        |                                                                                                                                                                                                                                     |                                                                                                                                                                                        |                                             |                                            |                                                                                           |                                            |                                                                                         |                 |

| Child's Behavior (Strengths and Difficulties Questionnaire)                                                                                                                                                                                                                                                                |          |               |                |
|----------------------------------------------------------------------------------------------------------------------------------------------------------------------------------------------------------------------------------------------------------------------------------------------------------------------------|----------|---------------|----------------|
| 21. For each item, please mark the box (Not True, Somewhat True or Certainly True.)It would help us if you answered all items as best you can even if you are not absolutely certain or the item seems daft! Please give your answers on the basis of the child's behavior over the last six months. (Choose one for each) | Not True | Somewhat true | Certainly true |
| A. Considerate of other people's feelings                                                                                                                                                                                                                                                                                  | 1        | 2             | 3              |
| B. Restless, overactive, cannot stay still for long                                                                                                                                                                                                                                                                        | 1        | 2             | 3              |
| C. Often complains of headaches, stomach-aches or sickness                                                                                                                                                                                                                                                                 | 1        | 2             | 3              |
| D. Shares readily with other children (treats, toys, pencils etc.)                                                                                                                                                                                                                                                         | 1        | 2             | 3              |
| E. Often has temper tantrums or hot tempers                                                                                                                                                                                                                                                                                | 1        | 2             | 3              |
| F. Rather solitary, tends to play alone                                                                                                                                                                                                                                                                                    | 1        | 2             | 3              |
| G. Generally obedient, usually does what adults request                                                                                                                                                                                                                                                                    | 1        | 2             | 3              |
| H. Many worries, often seems worried                                                                                                                                                                                                                                                                                       | 1        | 2             | 3              |

|                                                                        |   |   |   |
|------------------------------------------------------------------------|---|---|---|
| I. Helpful if someone is hurt, upset or feeling ill                    | 1 | 2 | 3 |
| J. Constantly fidgeting or squirming                                   | 1 | 2 | 3 |
| K. Has at least one good friend                                        | 1 | 2 | 3 |
| L. Often fights with other children or bullies them                    | 1 | 2 | 3 |
| M. Often unhappy, down-hearted or tearful                              | 1 | 2 | 3 |
| N. Generally liked by other children                                   | 1 | 2 | 3 |
| O. Easily distracted, concentration wanders                            | 1 | 2 | 3 |
| P. Nervous or clingy in new situations, easily loses confidence        | 1 | 2 | 3 |
| Q. Kind to younger children                                            | 1 | 2 | 3 |
| R. Often lies or cheats                                                | 1 | 2 | 3 |
| S. Picked on or bullied by other children                              | 1 | 2 | 3 |
| T. Often volunteers to help others (parents, teachers, other children) | 1 | 2 | 3 |
| U. Thinks things out before acting                                     | 1 | 2 | 3 |
| V. Steals from home, school or elsewhere                               | 1 | 2 | 3 |
| W. Gets on better with adults than with other children                 | 1 | 2 | 3 |
| X. Many fears, easily scared                                           | 1 | 2 | 3 |
| Y. Sees tasks through to the end, good attention span                  | 1 | 2 | 3 |

### Child's Dietary Intake

22. Does your child usually take breakfast? : <sup>1</sup> Yes <sup>2</sup> No

23. How often did your child eat the following food items during the last week?

|                                                           | Everyday | 5-6 times | 3-4 times | 1-2 times | Never | Unknown |
|-----------------------------------------------------------|----------|-----------|-----------|-----------|-------|---------|
| a) Rice and other cereals (finger millet)                 | 1        | 2         | 3         | 4         | 5     | 6       |
| b) Tubers (potato, sweet potato, cassava, etc.)           | 1        | 2         | 3         | 4         | 5     | 6       |
| c) Bread (Chapati/ Roti)                                  | 1        | 2         | 3         | 4         | 5     | 6       |
| d) Pulses / Dhal                                          | 1        | 2         | 3         | 4         | 5     | 6       |
| e) Fish                                                   | 1        | 2         | 3         | 4         | 5     | 6       |
| f) Meat (beef, pork, chicken)                             | 1        | 2         | 3         | 4         | 5     | 6       |
| g) Eggs                                                   | 1        | 2         | 3         | 4         | 5     | 6       |
| h) Dairy (curd, liquid milk, powder milk, etc.)           | 1        | 2         | 3         | 4         | 5     | 6       |
| i) Coconut products , palm oil, vegetable oil, fat & etc. | 1        | 2         | 3         | 4         | 5     | 6       |
| j) Vegetables (including leaves)                          | 1        | 2         | 3         | 4         | 5     | 6       |
| k) Fruits                                                 | 1        | 2         | 3         | 4         | 5     | 6       |
| l) Sugar / Jaggary                                        | 1        | 2         | 3         | 4         | 5     | 6       |
| m) Spices                                                 | 1        | 2         | 3         | 4         | 5     | 6       |
| n) Sweets (toffee, candy, chocolates, etc.)               | 1        | 2         | 3         | 4         | 5     | 6       |
| o) Sweetened beverages / Juice / fizzy drinks             | 1        | 2         | 3         | 4         | 5     | 6       |
| p) Fast food                                              | 1        | 2         | 3         | 4         | 5     | 6       |

24. Did your child buy any of the following at school during the last week?

|                                                      | Everyday | 3-4 times | 1-2 times | Never | Unknown |
|------------------------------------------------------|----------|-----------|-----------|-------|---------|
| a) Soda                                              | 1        | 2         | 3         | 4     | 5       |
| b) food with added salt<br>(e.g. : peanut, biscuits) | 1        | 2         | 3         | 4     | 5       |
| c) Sweets                                            | 1        | 2         | 3         | 4     | 5       |
| d) Other: Specify _____                              | 1        | 2         | 3         | 4     | 5       |

## Maternal Social Capital of the child

### 25. Membership of community groups and support:

1) In the last 12 months, has child's mother been an active member of any of the following types of groups in your community?

2) In the last 12 months, has child's mother receive any emotional help, economic help or assistance from the group?

| Group type                           | 1) Active member |    | 2) Support / Help |    |
|--------------------------------------|------------------|----|-------------------|----|
|                                      | Yes              | No | Yes               | No |
| 1) Work related/trade union          | 1                | 2  | 1                 | 2  |
| 2) Community association/cooperation | 1                | 2  | 1                 | 2  |
| 3) Women's group                     | 1                | 2  | 1                 | 2  |
| 4) Political group                   | 1                | 2  | 1                 | 2  |
| 5) Religious group                   | 1                | 2  | 1                 | 2  |
| 6) Credit / funeral group            | 1                | 2  | 1                 | 2  |
| 7) Sports/ social group              | 1                | 2  | 1                 | 2  |
| 8) Others: specify _____             | 1                | 2  | 1                 | 2  |

26. In the last 12 months, has child's mother received any help or support from any of the following, this can be emotional help, economic help or assistance in helping you know or do things?

|                                       | Yes | No |
|---------------------------------------|-----|----|
| 1) Family                             | 1   | 2  |
| 2) Neighbors                          | 1   | 2  |
| 3) Friends who are not neighbors      | 1   | 2  |
| 4) Community leaders                  | 1   | 2  |
| 5) Religious leader                   | 1   | 2  |
| 6) Politicians                        | 1   | 2  |
| 7) Government officials/civil service | 1   | 2  |
| 8) Charitable organizations / NGO     | 1   | 2  |
| 9) Other: specify _____               | 1   | 2  |

### 27. Citizenship activities and cognitive social capital

|                                                                                                                                            | Yes | No |
|--------------------------------------------------------------------------------------------------------------------------------------------|-----|----|
| 1) In the last 12 months, have child's mother joined together with other community members to address a problem or common issue?           | 1   | 2  |
| 2) In the last 12 months, have child's mother talked with a local authority or governmental organization about problems in this community? | 1   | 2  |
| 3) In general, can the majority of people in this community be trusted?                                                                    | 1   | 2  |
| 4) Do the majority of people in this community generally get along with each other?                                                        | 1   | 2  |
| 5) Do you feel as though you are really a part of this community?                                                                          | 1   | 2  |
| 6) Do you think that the majority of people in this community would try to take advantage of you if they got the chance?                   | 1   | 2  |

**Thank you very much for your cooperation.**
